# Supplementary material
Source: Springer Nature journal article supplement (https://www.springermedizin.de/resource/supplementary/12916_2009_213_MOESM2_ESM.pdf/9599406)

Number of cases

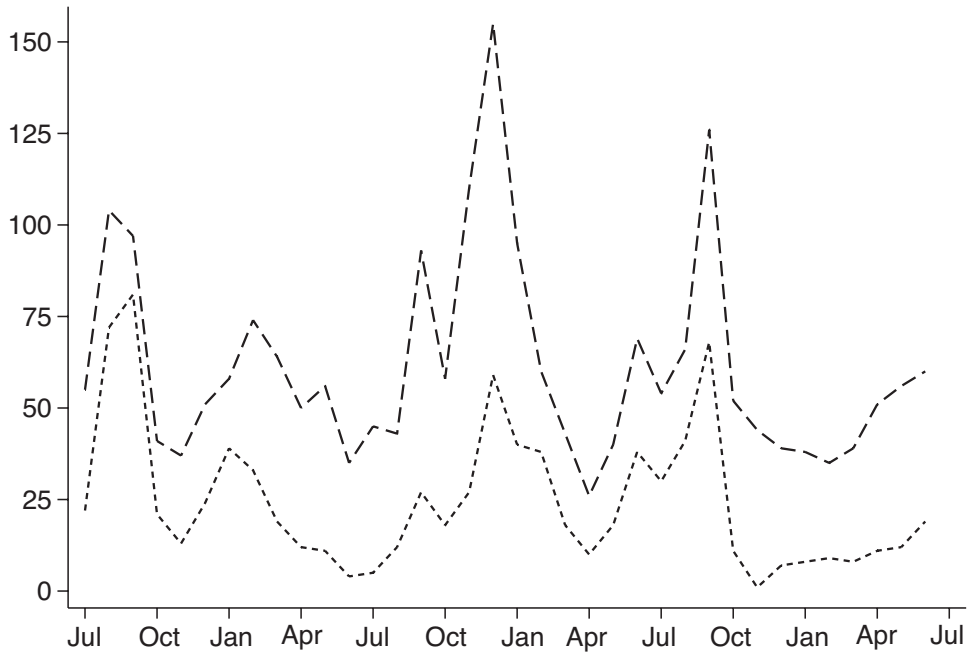

----- Pneumonia cases      ..... Viral cases

Supplement: MOESM2 [file 9599406]
